# Supplementary material for: Carbohydrate Polymer-Based Targeted Pharmaceutical Formulations for Colorectal Cancer: Systematic Review of the Literature
Source: MDPI journal article supplement (doi:10.3390/polysaccharides3040040), 2022-10-26
Supplement: s1 [file s1]

Archive with 1 entries (1 files):
- polysaccharides-1802677-supplementary-1.pdf
